# Supplementary material for: Interactions of problematic mobile phone use and psychopathological symptoms with unintentional injuries: a school-based sample of Chinese adolescents
Source: BMC Public Health. 2016 Jan 28;16:88. doi: 10.1186/s12889-016-2776-8 (PMC4731912; doi:10.1186/s12889-016-2776-8)
Supplement: Additional file 1: — Self-rating Questionnaire for Adolescent Problematic Mobile Phone Use (SQAPMPU). (DOC 44 kb) [file 12889_2016_2776_MOESM1_ESM.doc]

**Additional file 1**

Self-rating Questionnaire for Adolescent Problematic Mobile Phone Use (SQAPMPU)

| **Dimensions** | **No.** | **Items** | **Not true at al** | **Slightly**  **true** | **Moderately true** | **Strongly true** | **Extremely true** |
| --- | --- | --- | --- | --- | --- | --- | --- |
| **Withdrawal symptoms** | 2 | When I attempt to spend less time on or stop using my mobile phone, I feel depressed or [anxious](javascript:void(0);). | 1 | 2 | 3 | 4 | 5 |
| 4 | I become irritable if I have to switch off my mobile phone for meetings, dinner engagements, or at the movies. | 1 | 2 | 3 | 4 | 5 |
| 6 | When out of range for some time, I become preoccupied with the thought of missing a call. | 1 | 2 | 3 | 4 | 5 |
| 8 | I hear the phone ringing when it actually hasn’t which is called “ringxiety”, I always check my mobile phone [involuntarily](javascript:void(0);). | 1 | 2 | 3 | 4 | 5 |
| 11 | I feel anxious if I have not checked for messages or switched on my mobile phone for some time. | 1 | 2 | 3 | 4 | 5 |
| 13 | I feel lost without my mobile phone. | 1 | 2 | 3 | 4 | 5 |
| **Craving** | 1 | I can never spend enough time on my mobile phone. | 1 | 2 | 3 | 4 | 5 |
| 7 | I need to spend more time on my mobile phone to be satisfied. | 1 | 2 | 3 | 4 | 5 |
| 10 | I have frequent dreams about the mobile phone. | 1 | 2 | 3 | 4 | 5 |
| **Physical and mental health status** | 3 | I lose sleep due to the time I spend on my mobile phone. | 1 | 2 | 3 | 4 | 5 |
| 5 | There are times when I would rather use the mobile phone than deal with other more pressing issues. | 1 | 2 | 3 | 4 | 5 |
| 9 | My leisure activities are reduced due to the time I spend on my mobile phone. | 1 | 2 | 3 | 4 | 5 |
| 12 | My productivity has decreased as a direct result of the time I spend on the mobile phone. | 1 | 2 | 3 | 4 | 5 |
